# Supplementary material for: Inflammation-Induced Reactivation of the Ranavirus Frog Virus 3 in Asymptomatic Xenopus laevis
Source: PubMed Central journal article supplement (PMC4229299; doi:10.1371/journal.pone.0112904), 2014-11-12
Supplement: pone.0112904.s001.pdf [file pone.0112904.s001.pdf]

## 30 dpi FV3

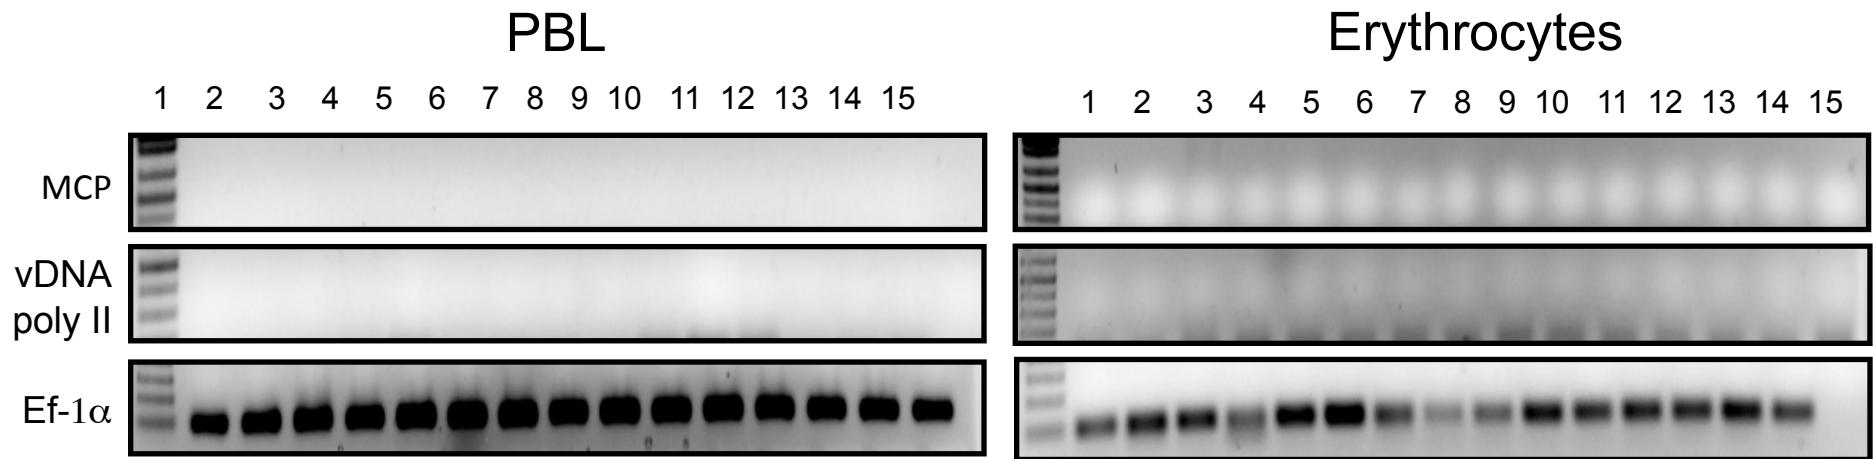

## FV3 35 dpi + HK *E. coli* stimulation

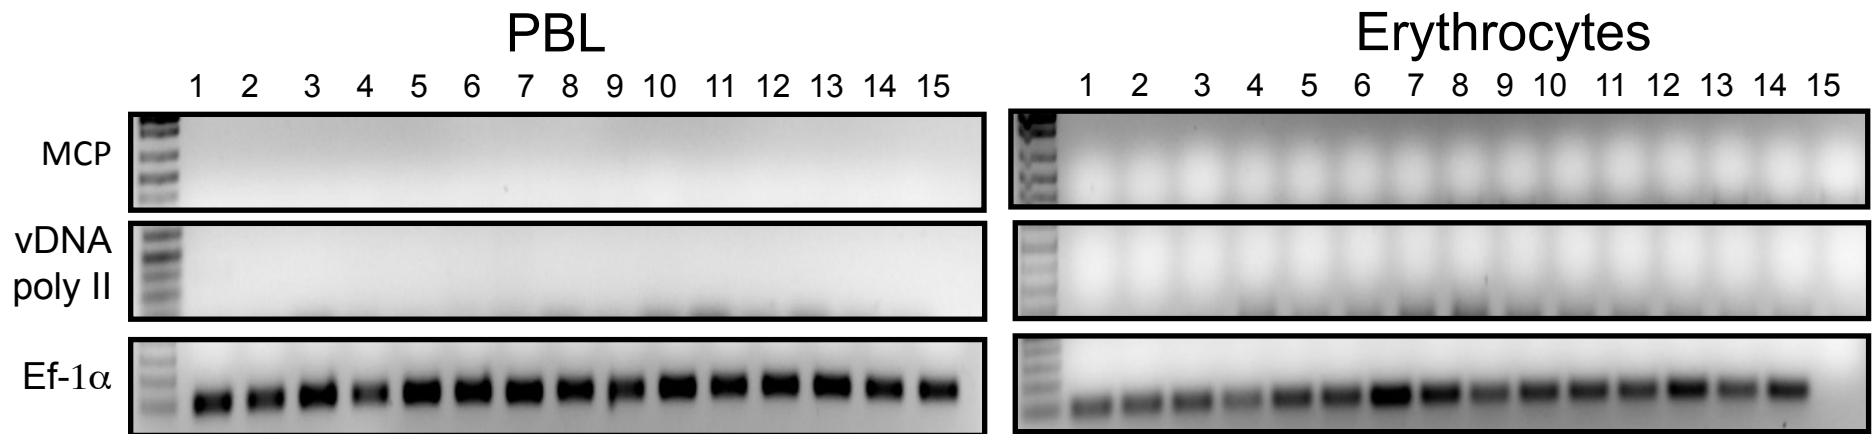

**Supplementary Fig. 1: Lack of detectable virus in PBLs and erythrocytes from frogs with reactivated asymptomatic infections.** PCR assay on total DNA purified from PBLs and erythrocytes from blood collected from 15 different frogs of experiment 3 (Fig. 1; Table 1) at 30 dpi, and from the same animals 3 days after bacterial stimulation (35 dpi). Presence of viral DNA was assed by PCR on 50 ng of total DNA using FV3 specific primers for MCP and vDNA poly II as well as *X. laevis* Ef-1a as a loading control.
